# Machine learning-based imaging biomarkers improve statistical power in clinical trials

Carolyn Lou<sup>a,b</sup>, Mohamad Habes<sup>b</sup>, Christos Davatzikos<sup>b,1,\*</sup>, Russell T. Shinohara<sup>a,b,1,\*</sup>, and Alzheimer's Disease Neuroimaging Initiative<sup>1</sup>

<sup>a</sup>Penn Statistics in Imaging and Visualization Center, Department of Biostatistics, Epidemiology, and Informatics, University of Pennsylvania, 423 Guardian Drive, Philadelphia, PA, 19104; <sup>b</sup>Center for Biomedical Image Computing and Analytics, Department of Radiology, University of Pennsylvania, 3700 Hamilton Walk, Philadelphia, PA, 19104;

\*Equal contribution

**Radiomic models, which leverage complex imaging patterns and machine learning, are increasingly accurate in predicting patient response to treatment and clinical outcome on an individual patient basis. In this work, we show that this predictive power can be utilized in clinical trials to significantly increase statistical power to detect treatment effects or reduce the sample size required to achieve a given power. Akin to the historical control paradigm, we propose to utilize a radiomic prediction model to generate a pseudo-control sample for each individual in the trial of interest. We then incorporate these pseudo-controls into the analysis of the clinical trial of interest using classical and well established statistical tools, and investigate statistical power. Effectively, this approach utilizes each individual's radiomics-based predictor of outcome for comparison with the actual outcome, potentially increasing statistical power considerably, depending on the accuracy of the predictor. In simulations of treatment effects based on real radiomic predictive models from brain cancer and prodromal Alzheimer's Disease, we show that this methodology can decrease the required sample sizes by as much as a half, depending on the strength of the radiomic predictor. We further find that this method is most helpful when treatment effect sizes are small and that power grows with the accuracy of radiomic prediction.**

Machine Learning | Personalized Medicine | Clinical Trials

In recent decades, rapid advances in technology have increased the amount of neuroimaging data available to researchers at an unprecedented rate (1, 2). Machine learning methods empower the integration of this high-dimensional data into powerful individualized predictive markers that have been shown to be useful for tasks such as diagnosis and prognosis in diseases such as Alzheimer's disease and brain cancers (3, 4). Predictive modeling is poised to receive the benefits of the large and varied nature of this data.

With the growing availability of big data in medical imaging, a central focus has emerged on the development of increasingly complex tools for their analysis with the primary goal of individualized predictions (5). In this paper, we propose harnessing these powerful machine learning tools for the analysis of clinical trials by using them as a means to inform statistical analyses with individualized estimates of clinical outcome. We therefore arrive at the concept of individualized evaluation of treatment effects in clinical trials.

There is an extensive literature on the use of historical controls to supplement data from new clinical trials that have largely relied on pooling methods or Bayesian modeling (6, 7). Whereas these methods augment data for a trial by incorporating historical data on the group level, high-dimensional predictors offer the opportunity to augment current trials by

incorporating historical data in the form of individualized predictions at the individual level. This allows for a more precise evaluation of the treatment effect for each person, rather than relying on a group-level effect that determines average outcome.

Here, we present a method that draws on these ideas while leveraging powerful predictive biomarkers and the wealth of data used to build them to generate personalized predictions of outcome. These predictions can be used directly in the analysis of data in clinical trials. We find that this methodology can substantially improve statistical power for detecting treatment effects, depending on the predictive power of the machine learning-based model. Correspondingly, this approach can substantially reduce the sample size needed to achieve the same power in a clinical trial.

## Methods

Our method relies on access to two sets of data: i) a current clinical trial designed to study an outcome of interest and ii) a cohort of similar subjects treated according to the current standard of care. We narrow our focus in this work to radiomic predictors and associated studies, so we assume that imaging data has been gathered at study enrollment for both sets of trials. However, more broadly we only require a predictive model that is based on sufficient information measured at baseline on each participant in both datasets to predict the outcome under standard of care. The techniques proposed here are also directly applicable to other -omic modeling scenarios, and generally, to any predictive marker of standard of care outcome.

Our basic premise herein is that we can utilize previously collected imaging data to build a radiomic prediction model, fully validate it, and use it to generate a single score that summarizes imaging patterns that predict future clinical outcome of interest, such as patient survival, progression-free survival, or response to treatment (Figure 1). The model that is built based on the historical trial can then be used in conjunction with data collected from the current trial to generate individualized values of the radiomic score for each of the current participants. These individualized scores represent

R.T.S. and C.D. designed research; C.L. performed research; C.L. and M.H. analyzed data; and C.L., M.H., R.T.S., and C.D. wrote the paper.

The authors declare no conflict of interest.

Data used in preparation of this article were obtained from the ADNI database ([adni.loni.usc.edu](http://adni.loni.usc.edu)). As such, the investigators within the ADNI contributed to the design and implementation of ADNI and/or provided data but did not participate in analysis or writing of this report.

<sup>1</sup>To whom correspondence may be addressed. E-mails: [christos.davatzikos@pennmedicine.upenn.edu](mailto:christos.davatzikos@pennmedicine.upenn.edu) or [rshi@pennmedicine.upenn.edu](mailto:rshi@pennmedicine.upenn.edu)

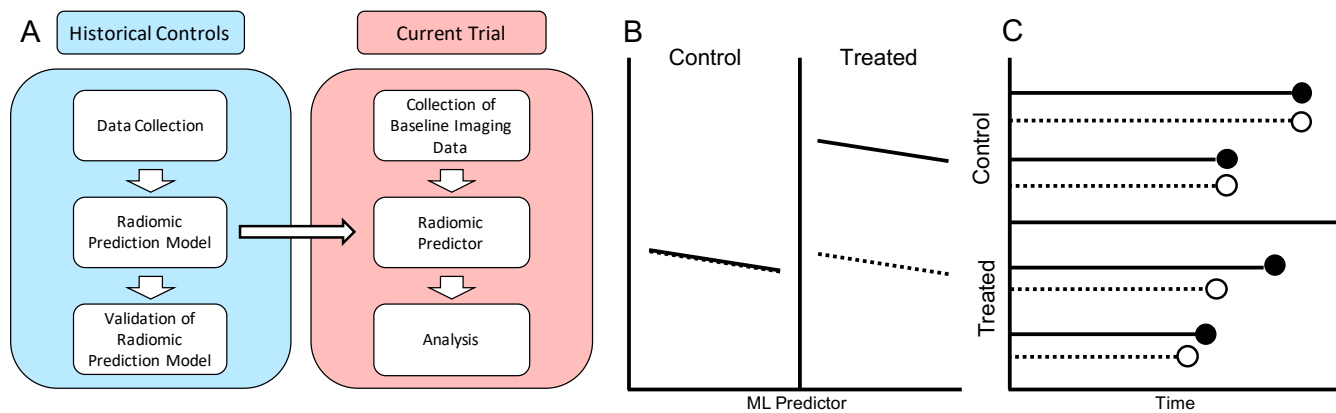

**Fig. 1.** A: Workflow for implementing the proposed method in a new clinical trial. B (continuous) and C (survival outcome): Schematic diagram for individualized predictions that are generated for each person in the current trial, where the solid lines indicate observed outcome for the participants of the current trial and the dashed lines indicate predicted outcome for those participants had they not been treated.

64 predicted values for how the treated individuals in the current  
 65 trial would have fared had they instead been assigned to the  
 66 control group. The incorporation of these predicted values  
 67 lends power to the detection of the effect of a treatment in the  
 68 final analysis of the current trial by modeling the inter-subject  
 69 variability in the outcome in terms of baseline heterogeneity  
 70 represented in the baseline imaging.

71 To investigate the advantage of this approach, we consider  
 72 two scenarios. To more closely approximate real-life clinical  
 73 trial performance, we use radiomic and outcome data from  
 74 two observational studies to generate hypothetical study data,  
 75 where the first focuses on continuous outcomes of cognitive  
 76 decline in prodromal Alzheimer’s disease (AD) and the second  
 77 on survival after diagnosis with glioblastoma multiforme  
 78 (GBM). In these studies, we randomly split the data into a  
 79 historical cohort and a trial cohort and then simulate effects  
 80 in a randomly selected subset (corresponding to one arm) of  
 81 the trial cohort. We then compare the statistical power of our  
 82 proposed approach with the classical modeling approach that  
 83 does not include radiomic prediction-based modeling.

84 **Data.** In our first study, we consider the case of therapeutic  
 85 trials for AD in which the outcome is longitudinal cognitive  
 86 change. We utilize data derived from the Alzheimer’s Disease  
 87 Neuroimaging Initiative (ADNI, [adni.loni.usc.edu](http://adni.loni.usc.edu)) on 400 subjects  
 88 with mild cognitive impairment (MCI) who underwent  
 89 serial MRI at 1.5T\*. Data used from this study consisted  
 90 of cross-validated predictions of time to AD diagnosis using  
 91 the SPARE-AD score (8). SPARE-AD is derived from pat-  
 92 terns of regional brain atrophy (volume loss) captured by atlas  
 93 warping methods and high-dimensional pattern classification  
 94 using support vector machines (SVM) aiming to differentiate  
 95 cognitively normal and Alzheimer’s disease subjects (3, 9).  
 96 The outcome of interest here is cognitive decline as measured  
 97 by 3-year change from baseline values of the ADNI composite  
 98 memory score (10) (ADNI-MEM). Of the 400 MCI subjects  
 99 in our study, 283 have 3-year ADNI-MEM scores available.  
 100 Average 3-year change from baseline for ADNI-MEM in the  
 101 current study was -0.17 (standard deviation 0.49).

102 As a second case study, we focus on therapeutic trials for

103 GBM therapies, which aim to prolong survival after diagnosis.  
 104 We conduct our simulated treatment study using 134 patients  
 105 who were treated for newly diagnosed GBM at the Hospital of  
 106 the University of Pennsylvania between 2006 and 2013. The  
 107 actual median survival in this sample was 12 months, and  
 108 survival data were assessed for all subjects with no loss to  
 109 follow-up. Detailed demographics and a clinical description of  
 110 these subjects have been previously published (4). For studies  
 111 involving these data, we investigate the use of cross-validated  
 112 predictions of survival time based on radiomic analyses of  
 113 pre- and post-contrast T1-weighted, FLAIR, diffusion, and  
 114 perfusion imaging acquired pre-operatively at diagnosis. This  
 115 GBM predictive model utilizes an SVM to differentiate short,  
 116 medium, and long survival (4).

117 **Statistical Methods.** All hypothesis testing is conducted assum-  
 118 ing a 5% type I error rate and using two-sided alternatives. For  
 119 our continuous outcome analyses, we apply linear regression  
 120 modeling of the outcome and employ Wald tests to assess  
 121 whether treatment groups differed in their outcomes either i)  
 122 adjusting for the radiomic predictor by inclusion as covariate,  
 123 or the classical approach with corresponds to ii) not adjusting  
 124 for the radiomic predictor. For time-to-event outcomes, we  
 125 assess differences between treatment groups with and with-  
 126 out adjustment for the radiomic prediction by assuming an  
 127 accelerated failure time model.

128 We conduct two sets of real data simulations: one set  
 129 focusing on cognitive decline in AD, and one set focusing  
 130 on GBM survival outcomes. For both, we sample without  
 131 replacement twice from the observed data: for the first group  
 132 indexed by  $i = 1, \dots, n/2$ , we set our treatment indicator  
 133  $A_i = 0$  and record the observed outcome  $Y_{i0}$ , as well as the  
 134 value of the radiomic predictor  $X_i$  at baseline. For the second  
 135 group, indexed by  $i = n/2 + 1, \dots, n$ , we introduce a treatment  
 136 effect  $\gamma$ , set our treatment indicator  $A_i = 1$ , and again record  
 137 outcome  $Y_{i0}$  and baseline radiomic predictor measurement  
 138  $X_i$ . We repeat this process 1000 times, recording the p-value  
 139 corresponding to the test for treatment effect each time. We  
 140 calculate type I error rate and power as the percentage of time  
 141 the treatment effect is significant at the  $\alpha = 0.05$  level, where  
 142  $\gamma$  is set to 0 to assess type I error and a non-zero value to assess  
 143 power. In order to quantify the sample size benefits from using

\*The ADNI was launched in 2003 as a public-private partnership, led by Principal Investigator Michael W. Weiner, MD. For up-to-date information, see [www.adni-info.org](http://www.adni-info.org).

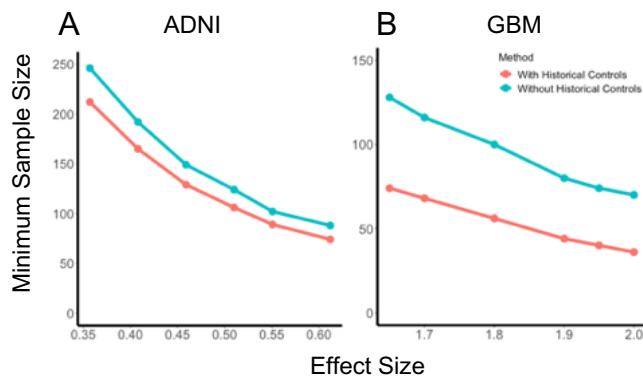

**Fig. 2.** Results from simulated studies under two scenarios. With the addition of historical controls, the required sample size for 80% power is markedly lower than using classical two-sample clinical trial analysis.

in more modest improvements in (or, in extreme cases, even loss of) statistical power. Cost-benefit analyses are thus warranted. Finally, if a radiomic predictor is trained on data from a different population compared with those studied in the current trial, the improvements in statistical power may be less pronounced. However, due to the randomization in the study, the type I error rate is expected to be maintained and internal validation or calibration of the predictive model is possible using data from the control arm of a clinical trial.

Further studies of the misspecification of the predictive model as well as the clinical trial outcome model are warranted for assessing potential gains and loss of power in these settings. However, misspecification of clinical outcome models can be guarded against using statistical models satisfying symmetry criteria (12). The biomarkers from the two cases presented here were both built using SVMs, but this methodology can accommodate predictions more generally. Incorporation of these biomarkers into a one-arm trial designs in which all participants in the trial are treated similarly also requires further statistical research.

**ACKNOWLEDGMENTS.** This work was supported in part by NIH grants R01NS085211, R01MH112847, R01NS060910, RF1AG054409, R01EB022573, R01NS042645, and R01MH112070.

1. RC Petersen, et al., Alzheimer's disease neuroimaging initiative (adni): clinical characterization. *Neurology* **74**, 201–209 (2010).
2. BH Menze, et al., The multimodal brain tumor image segmentation benchmark (brats). *IEEE transactions on medical imaging* **34**, 1993–2024 (2014).
3. C Davatzikos, F Xu, Y An, Y Fan, SM Resnick, Longitudinal progression of alzheimer's-like patterns of atrophy in normal older adults: the spare-ad index. *Brain* **132**, 2026–2035 (2009).
4. L Macyszyn, et al., Imaging patterns predict patient survival and molecular subtype in glioblastoma via machine learning techniques. *Neuro-oncology* **18**, 417–425 (2015).
5. C Davatzikos, P Bhatt, LM Shaw, KN Batmanghelich, JQ Trojanowski, Prediction of mci to ad conversion, via mri, csf biomarkers, and pattern classification. *Neurobiol. aging* **32**, 2322–e19 (2011).
6. SJ Pocock, The combination of randomized and historical controls in clinical trials. *J. chronic diseases* **29**, 175–188 (1976).
7. K Viele, et al., Use of historical control data for assessing treatment effects in clinical trials. *Pharm. statistics* **13**, 41–54 (2014).
8. X Da, et al., Integration and relative value of biomarkers for prediction of mci to ad progression: spatial patterns of brain atrophy, cognitive scores, apoe genotype and csf biomarkers. *NeuroImage: Clin.* **4**, 164–173 (2014).
9. Y Fan, et al., Spatial patterns of brain atrophy in mci patients, identified via high-dimensional pattern classification, predict subsequent cognitive decline. *Neuroimage* **39**, 1731–1743 (2008).
10. PK Crane, et al., Development and assessment of a composite score for memory in the alzheimer's disease neuroimaging initiative (adni). *Brain imaging behavior* **6**, 502–516 (2012).
11. K Kantarci, CR Jack, Neuroimaging in alzheimer disease: an evidence-based review. *Neuroimaging Clin.* **13**, 197–209 (2003).
12. RT Shinohara, CE Frangakis, CG Lykettos, A broad symmetry criterion for nonparametric validity of parametrically based tests in randomized trials. *Biometrics* **68**, 85–91 (2012).

144 this method, we repeat the above procedure for a range of  
145 sample sizes  $n$ , and the smallest  $n$  for which power reaches  
146 80% is recorded. We explore this for a range of hypothetical  
147 effect sizes, which is defined here as  $\gamma$  divided by the standard  
148 deviation of the outcome.

## 149 Results

150 For both continuous and time-to-event outcomes, we find that  
151 the proposed method reduces the minimum sample size  $n$   
152 required for 80% power in clinical trial analyses (Figure 2).  
153 The inclusion of the imaging biomarker tends to be most  
154 helpful in terms of the absolute differences when the effect  
155 sizes are small. Type I error remains controlled throughout  
156 all experiments conducted. In the ADNI study, the classical  
157 analysis requires 16% to 18% more samples than our proposed  
158 method. In the GBM study, the classical analysis requires  
159 around 73% to 94% more samples than our proposed method.

## 160 Discussion

161 We have shown that individualized machine learning-based  
162 imaging biomarkers can be a useful tool in a clinical trial  
163 analysis, offering an increase in power and/or a reduction of  
164 the required sample size. The novelty of this method arises  
165 from the incorporation of individualized predictions, which  
166 derive their usefulness from the powerful predictive algorithms  
167 they are based upon. As neuroimaging biomarkers derived via  
168 machine learning become more common, the set of historical  
169 data for which we have biomarker values also becomes larger,  
170 which promises to strengthen the radiomic prediction model  
171 that we use to generate predicted values.

172 Here, we used two previously developed biomarkers, one  
173 of which was trained to classify an outcome different from  
174 the target of the clinical trial analysis, and another which  
175 was trained to classify the same outcome as the clinical trial  
176 analysis. While both predictors offered gains in sample size  
177 reduction, predictors built specifically for the outcome of in-  
178 terest in the clinical trial are likely to perform better and offer  
179 more substantial gains.

180 The approach proposed in this paper does have some limi-  
181 tations. First, the use of radiomic predictions can be hindered  
182 by the cost of collecting imaging data (11). Furthermore, in-  
183 sufficient performance of the radiomic prediction can result
